# Supplementary material for: Sepsis impedes EAE disease development and diminishes autoantigen-specific naive CD4 T cells
Source: eLife. 2020 Nov 16;9:e55800. doi: 10.7554/eLife.55800 (PMC7721438; doi:10.7554/eLife.55800)
Supplement: Figure 1—figure supplement 1—source data 1. [file elife-55800-fig1-figsupp1-data1.xlsx]

## Sheet: Sheet1
	2020-09-26	2020-09-27	2020-09-28	2020-09-29	2020-09-30	2020-10-01	2020-10-02	2020-10-03	2020-10-04	2020-10-05	2020-10-06	2020-10-07	2020-10-08	2020-10-09	2020-10-10	2020-10-11	2020-10-12	2020-10-13	2020-10-14	2020-10-15	2020-10-16	2020-10-17	2020-10-18	2020-10-19	2020-10-20	2020-10-21	2020-10-22	2020-10-23	2020-10-24	2020-10-25	2020-10-26	2020-10-27	2020-10-28	2020-10-29	2020-10-30	2020-10-31
	5	6	7	8	9	10	11	12	13	14	15	16	17	18	19	20	21	22	23	24	25	26	27	28	29	30	31	32	33	34	35	36	37	38	39	40
Sham	0	0	0	0	0	0	0	0	1	3	3	4	4	5	5	5	5	5	5	5	5	5	5	5	5	5	5	5	5	5	5	5	5	5	5	5
	0	0	0	0	0	0	0	0	0	0	0	0	0	0	0	1	1	1	1	1	1	1	1	1	1	1	1	1	1	1	1	1	1	1	1	1
	0	0	0	0	0	0	0	0	0	0	0	1	1	2	3	3	2	2	1	2	2	2	1	2	2	1	2	2	2	2	2	3	3	3	3	2
	0	0	0	0	0	0	0	0	0	0	0	0	0	1	1	1	1	1	2	1	2	2	2	2	2	4	3	3	3	3	3	3	3	4	4	5
	0	0	0	0	0	0	0	0	1	2	3	3	3	3	2	2	2	2	1	2	2	2	2	2	2	3	3	2	2	2	2	2	2	2	2	3
	0	0	0	0	0	0	0	0	0	2	3	3	3	3	4	3	4	5	5	5	5	5	5	5	5	5	5	5	5	5	5	5	5	5	5	5
	0	0	0	0	0	0	0	0	0	0	0	0	1	1	3	3	4	3	3	3	2	2	2	2	2	2	2	2	2	2	2	2	2	3	3	2
	0	0	0	0	0	0	0	0	0	0	0	0	0	0	0	1	1	2	3	3	2	2	2	2	2	2	2	2	2	2	2	2	3	4	4	5
	0	0	0	0	0	0	0	0	0	0	1	2	3	3	3	3	2	2	2	2	2	2	2	2	2	2	2	2	2	2	2	2	2	3	3	3
	0	0	0	0	0	0	0	0	0	2	3	3	4	3	3	3	3	2	2	1	2	2	2	2	2	2	2	2	2	2	2	2	2	2	2	2
	0	0	0	0	0	0	0	0	0	0	0	0	0	0	0	0	0	1	1	1	1	1	1	1	1	1	1	1	1	1	1	1	1	1	1	1
	0	0	0	0	0	0	0	0	0	0	1	2	3	3	3	3	1	2	2	2	2	2	2	2	2	2	2	2	2	2	2	2	2	2	2	2
	0	0	0	0	0	0	0	0	0	0	0	0	0	0	0	0	0	0	0	0	0	0	0	0	0	0	0	0	0	0	0	0	0	0	0	0
	0	0	0	0	0	0	0	0	1	2	3	3	4	3	4	5	5	5	5	5	5	5	5	5	5	5	5	5	5	5	5	5	5	5	5	5
	0	0	0	0	0	0	0	0	0	2	3	3	4	3	3	3	3	3	3	3	2	2	3	2	2	2	2	2	3	3	3	3	3	3	3	3
CLP	0	0	0	0	0	0	0	0	0	0	0	0	0	0	0	0	1	0	0	0	0	0	0	0	0	0	0	0	0	0	0	0	0	0	0	0
	0	0	0	0	0	0	0	0	0	0	0	0	0	0	0	0	0	0	0	0	0	1	0	0	0	0	0	0	0	0	0	0	0	0	0	0
	0	0	0	0	0	0	0	0	0	0	0	0	0	0	0	0	0	0	0	0	0	0	0	1	0	0	0	0	0	0	0	0	0	0	0	0
	0	0	0	0	0	0	0	0	0	0	0	0	0	0	0	0	0	0	0	0	1	0	0	0	0	0	0	0	0	0	0	0	0	0	0	0
	0	0	0	0	0	0	0	0	0	0	0	0	0	0	0	0	0	0	0	0	0	0	0	0	0	0	0	0	0	0	0	0	0	0	0	0
	0	0	0	0	0	0	0	0	0	0	0	0	0	0	0	0	0	0	0	0	0	0	1	0	0	0	0	0	0	0	0	0	0	0	0	0
	0	0	0	0	0	0	0	0	0	0	0	0	0	0	1	0	0	0	0	0	0	1	0	0	0	0	0	0	0	0	0	0	0	0	0	0
	0	0	0	0	0	0	0	0	0	0	1	0	0	0	0	0	0	0	0	0	0	0	0	0	0	0	0	0	0	0	0	0	0	0	0	0
