# Supplementary material for: Sepsis impedes EAE disease development and diminishes autoantigen-specific naive CD4 T cells
Source: eLife. 2020 Nov 16;9:e55800. doi: 10.7554/eLife.55800 (PMC7721438; doi:10.7554/eLife.55800)
Supplement: Figure 1—figure supplement 2—source data 1. [file elife-55800-fig1-figsupp2-data1.xlsx]

## Sheet: Figure 1-figure supplement 1
	D5 Sham										D20 Sham												D5 CLP									D20 CLP
	1	2	3	4	5	6	7	8	9	10	1	2	3	4	5	6	7	8	9	10			1	2	3	4	5	6	7	8	9	1	2	3	4	5	6	7	8	9
Mo G-CSF (54)	219.74	158.51	147.42	146.65	135.11	138.96	425.22	266.73	185.11	331.02	754.69	244.03	1159.94	801.46	898.18	425.59	1053.36	1013.8	1279.26	311.86		Mo IL-1a (53)	23.4	42.38	17.39	52.02	23.9	28.02	30.91	31.87	42.23	23.9	21.38	10.2	46.72	28.34	29.63	26.38	15.25	17.74
Mo RANTES (55)	225.72	175.64	150.19	188.29	239.19	140.66	197.33	240.86	190.38	137.33	195.25	462.45	300.74	241.87	332.28	169.26	237.51	256.85	254.86	237.51		Mo IL-1b (19)	5.22	6.02	2.69	6.02	11.09	4.4	OOR <	3.84	6.02	29.87	9.11	OOR <	21.56	6.55	27.5	7.07	7.07	4.4
Mo IL-6 (38)	12.55	6.11	9.44	6.6	6.89	2.29	10.03	9.68	8.36	7.43	21.33	7.28	36.26	13.54	12.5	4.28	21.43	19.11	76.92	12.2		Mo IL-2 (36)	5.66	8.29	5.97	6.27	8.01	4.39	6.86	6.57	8.01	6.86	10.18	11.74	19.08	19.31	52.81	11.74	5.04	20.42
Mo Eotaxin (74)	2938.04	1942.72	2155.86	2097.02	2702.8	1574.99	2710.4	1920.79	2534.03	1708.74	2381.9	3086.55	3773.61	2615.22	2910.48	2204.47	2695.41	2423.59	2175.77	2217.24		Mo IL-3 (18)	6.7	6.47	4.46	8.9	7.58	17.32	4.23	5.81	18.82	5.36	6.7	11.95	17.32	4.91	32.81	7.58	4.91	18.82
Corticosterone	322.2	459.4	217.8	676.5	716.1	2030	595.8	224.4	764.2	322.2	900.8	2810	537.3	6026	1274	3183	191.5	933.7	913.8	725.4		Mo IL-4 (39)	2.74	2.74	2.07	1.84	0.41	1.14	OOR <	0.41	1.5	2.3	2.74	1.38	4.49	2.3	0.66	0.66	2.3	1.14
Mo MIP-1a (77)	2.85	3.49	1.86	2.77	2.92	2.77	4.6	5.21	4.47	3.21	13.23	4.6	4.81	4.54	3.78	2.62	2.92	4.26	2.32	2.17		Mo IL-5 (52)	28.58	27.96	10.79	6.34	25.45	16.33	8.98	4.76	54.51	10.79	22.58	0.22	60.69	13.6	10.07	7.86	8.61	3.1
Mo IL-10 (56)	22.52	40.58	41.33	45.03	36.8	7.16	23.35	60.76	36.8	44.3	22.52	55.84	52.28	57.96	39.08	28.23	22.52	39.83	42.82	33.73		Mo IL-6 (38)	83.51	94.41	65.74	106.36	67.17	102.55	86.1	91.43	159.56	13.45	28.55	37.7	45.6	25.79	37.91	18.5	7.97	103.58
Mo IFN-g (34)	21.57	27.39	23.42	31.63	23.11	23.42	26.18	34.04	84.15	28.61	44.45	37.92	40.9	38.22	23.11	38.22	50.04	25.87	40.01	16.9		Mo IL-9 (33)	21.86	319.53	14.89	98.77	36.12	37.31	41.92	12.26	56.39	33.1	66.84	26.7	47.99	36.72	49.6	41.36	21.13	93.96
Mo IL-17 (72)	3.1	10.46	33.15	13.05	9.44	7.8	21.06	13.76	9.88	14.18	5.67	12.34	31.99	12.05	12.48	13.33	17.79	13.05	18.61	13.05		Mo IL-10 (56)	33.73	27.43	6.13	83.76	19.15	19.15	OOR <	30.61	22.52	8.17	55.84	1.5	27.43	38.32	47.23	19.15	36.04	128.05
Mo IL-4 (39)	4.39	3.52	5.14	4.92	2.74	2.3	2.97	4.06	5.14	4.28	7.35	4.49	7.25	4.49	2.74	5.77	2.74	3.08	1.61	1.84		Mo IL-12(p40) (76)	1274.86	658.57	905.14	439.54	831.89	268.07	854.7	387.77	479.8	1356.77	3493.05	819.29	2242.82	3532.25	2383.24	2118.84	5421.6	340.73
Mo IL-5 (52)	8.24	3.1	11.5	5.56	3.94	4.76	2.22	16.33	10.07	9.71	6.73	7.86	10.79	14.29	0.22	5.95	7.86	11.86	OOR <	5.16		Mo IL-12(p70) (78)	55.09	4.5	33.38	55.9	49.45	9.33	31.78	34.98	82.59	59.93	33.38	13.34	68.82	55.09	54.28	63.16	70.44	37.39
Mo IL-2 (36)	5.97	7.44	16.58	8.01	8.57	0.39	13.24	11.74	7.44	8.01	5.04	12.49	21.07	9.65	8.01	7.44	8.57	6.86	7.73	3.72		Mo IL-13 (37)	191.29	194.99	93.04	164.99	194.99	202.35	109.73	109.73	172.58	187.57	202.35	157.33	354.78	238.46	301.09	172.58	164.99	338.17
Mo TNF-a (21)	41.65	63.79	281.71	66.9	60.67	33.55	59.1	76.18	51.22	60.67	48.05	76.18	302.81	88.43	48.05	65.35	70.01	60.67	41.65	41.65		Mo IL-17 (72)	12.62	14.18	5.04	6.9	12.19	29.27	10.32	7.2	24.53	37.74	23.74	8.7	49.13	60.98	78.07	18.61	18.89	8.7
Mo IL-12(p70) (78)	126.67	76.91	44.62	137.35	73.67	38.2	86.65	96.42	96.42	63.97	96.42	122.57	122.57	104.57	69.63	79.35	96.42	46.23	71.24	49.45		Mo Eotaxin (74)	1564.77	1937.78	1633.99	2413.11	1241.7	2044.24	1666.24	1441.04	2089.27	1962.69	1556.12	1663.69	2075.58	2261.18	1295.22	1480.59	1714.25	3399.41
Mo GM-CSF (73)	62.34	92.8	101.41	50.13	OOR <	OOR <	62.34	96.34	62.34	72.43	56.59	67.58	158.78	112.32	50.13	89.11	67.58	94.59	56.59	3.91		Mo G-CSF (54)	2223.68	2986.89	1760.96	6426.36	2172.74	2998.16	2185.66	3701.46	2313.15	343.89	957.75	496.73	581.22	1004.94	521.87	549.91	250	1201.72
Mo MIP-1b (75)	283.52	226.29	119.32	248.56	214.63	149.53	224.65	277.75	455.2	209.52	250.11	283.52	311.45	289.94	195.46	185.41	236.79	252.42	249.34	168.12		Mo GM-CSF (73)	122.24	92.8	76.96	197.77	76.96	138.76	50.13	42.65	123.59	42.65	62.34	19.88	123.59	83.27	229.62	56.59	42.65	172.75
Mo IL-3 (18)	3.78	5.81	30.7	4.91	6.25	2.16	6.03	7.14	4.46	5.81	5.81	5.81	25.62	8.02	4.01	7.58	5.81	6.92	3.55	3.55		Mo IFN-g (34)	21.26	188.84	12.78	38.82	20.64	34.94	17.21	13.73	30.12	25.26	50.63	16.27	40.01	22.19	40.9	39.41	34.64	61.7
Mo MCP-1 (51)	388.85	430.06	310.34	388.85	327.32	221.06	430.06	395.97	310.34	310.34	343.58	388.85	455.77	443.07	273.76	273.76	351.46	359.21	154.22	443.07		Mo KC (57)	120.64	93.48	63.76	25.01	96.69	178.59	42.79	66.85	77.43	35.04	51.07	78.17	139.37	62.2	72.18	60.64	46.97	104.09
Mo IL-13 (37)	149.61	202.35	117.9	164.99	149.61	117.9	216.93	273.59	273.59	157.33	149.61	209.66	227.74	164.99	187.57	202.35	164.99	224.15	117.9	157.33		Mo MCP-1 (51)	468.17	318.93	310.34	786.25	327.32	374.28	196.69	351.46	455.77	292.54	449.45	209.18	569.52	515.27	537.52	430.06	468.17	395.97
Mo IL-1a (53)	66.71	30.91	45.98	46.87	18.27	36.26	46.42	33.13	64.47	25.07	48.05	51.58	80.62	43.88	40.56	29.15	44.93	22.73	25.4	20.18		Mo MIP-1a (77)	3.49	3.35	2.85	11.95	2.62	5.67	1.54	4.19	3.64	2.62	2.62	2.02	3.06	3.85	4.4	3.06	2.48	6.26
Mo IL-1b (19)	4.68	6.81	3.84	6.55	4.95	2.69	3.84	8.61	6.02	5.49	5.49	2.69	6.55	7.59	5.49	7.33	3.27	6.55	2.39	3.27		Mo MIP-1b (75)	187.26	769.7	155.9	470.94	207.79	166.13	271.18	186.34	227.11	252.42	322.24	157.98	270.44	315.52	258.51	265.26	227.11	387.19
Mo IL-9 (33)	41.92	56.9	41.36	45.27	26.7	14.04	43.05	44.16	167.75	29.96	38.48	53.29	50.67	56.9	23.28	39.06	62.92	31.23	63.41	18.89		Mo RANTES (55)	93.08	48.37	72.83	106.16	94.68	66.38	37.75	58.45	35.24	130.25	229.43	71.98	496.03	260.16	267.1	252.2	565.79	123.09
Mo KC (57)	28.74	61.81	41.94	58.28	44.47	35.91	50.66	53.09	51.88	42.79	45.31	40.24	49.44	42.79	34.15	34.15	46.14	41.52	30.57	24.06		Mo TNF-a (21)	70.01	73.1	60.67	88.43	70.01	136.39	23.63	51.22	83.85	30.27	60.67	59.1	85.38	60.67	430.55	44.86	44.86	203.42
Mo IL-12(p40) (76)	1953.25	3385.13	1102.57	2133.83	3076.93	2237.8	3528.92	3404.96	2085.76	2938.02	716.72	1519.99	927.98	1257.3	1009.78	340.73	1864.06	972.47	2810.91	818.09		Corticosterone	494.8	881.8	125.1	1102	209.3	549.6	163	213.9	664.1	351	440.9	1119	624.8	660	288.1	1274	343.1	1093
Normalized values for heatmaps
	D5 Sham										D20 Sham
Mo G-CSF (54)	-0.726136	-0.88209	-0.910337	-0.912298	-0.941691	-0.931885	-0.202774	-0.606452	-0.814339	-0.442703	0.636394	-0.664269	1.66858	0.755519	1.00187	-0.201831	1.39711	1.29635	1.97249	-0.491504
Mo RANTES (55)	-0.0399269	-0.709004	-1.04902	-0.539998	0.140035	-1.17634	-0.419222	0.162346	-0.512075	-1.22083	-0.447011	3.12283	0.962353	0.17584	1.38373	-0.794242	0.11759	0.375975	0.349388	0.11759
Mo IL-6 (38)	-0.161778	-0.553229	-0.350817	-0.523445	-0.505817	-0.785425	-0.314954	-0.336229	-0.416464	-0.472994	0.371909	-0.482111	1.27942	-0.101601	-0.164817	-0.664464	0.377988	0.236968	3.75091	-0.183052
Mo Eotaxin (74)	0.965206	-0.95787	-0.546058	-0.659744	0.510695	-1.66837	0.525379	-1.00024	0.184611	-1.40995	-0.109322	1.25215	2.57963	0.34148	0.911957	-0.452138	0.496416	-0.0287721	-0.50759	-0.427465
Corticosterone	-0.618557	-0.520899	-0.692869	-0.366367	-0.33818	0.597054	-0.423809	-0.688172	-0.303942	-0.618557	-0.20671	1.15226	-0.465449	3.44141	0.0589334	1.41776	-0.71159	-0.183292	-0.197457	-0.33156
Mo MIP-1a (77)	-0.467899	-0.200528	-0.881489	-0.50132	-0.438655	-0.50132	0.263193	0.518031	0.208884	-0.317503	3.86852	0.263193	0.350924	0.238127	-0.0793758	-0.563986	-0.438655	0.121152	-0.689316	-0.751981
Mo IL-10 (56)	-1.10504	0.212081	0.266778	0.536619	-0.063595	-2.22524	-1.0445	1.68381	-0.063595	0.48338	-1.10504	1.32499	1.06536	1.4796	0.102685	-0.688605	-1.10504	0.157383	0.375444	-0.28749
Mo IFN-g (34)	-0.840263	-0.445499	-0.71478	-0.157905	-0.735807	-0.71478	-0.527572	0.00556196	3.40446	-0.362748	0.711659	0.268738	0.470867	0.289086	-0.735807	0.289086	1.09082	-0.548599	0.4105	-1.15702
Mo IL-17 (72)	-1.49902	-0.515004	2.5186	-0.168727	-0.651376	-0.870641	0.902194	-0.0738013	-0.592549	-0.0176481	-1.15542	-0.263652	2.36351	-0.302425	-0.244935	-0.131291	0.465001	-0.168727	0.574634	-0.168727
Mo IL-4 (39)	0.216853	-0.323726	0.682869	0.546171	-0.808383	-1.08178	-0.665471	0.0118057	0.682869	0.148504	2.05606	0.278988	1.99393	0.278988	-0.808383	1.07432	-0.808383	-0.597122	-1.51051	-1.3676
Mo IL-5 (52)	0.131148	-1.0992	0.911486	-0.510356	-0.898132	-0.70185	-1.30984	2.06763	0.569191	0.483018	-0.230297	0.0401885	0.741535	1.57932	-1.78858	-0.417003	0.0401885	0.997658		-0.606104
Mo IL-2 (36)	-0.650821	-0.324132	1.70711	-0.197457	-0.0730048	-1.8909	0.964841	0.631486	-0.324132	-0.197457	-0.857501	0.798164	2.70496	0.167011	-0.197457	-0.324132	-0.0730048	-0.45303	-0.259684	-1.15085
Mo TNF-a (21)	-0.549259	-0.247241	2.72546	-0.204817	-0.289802	-0.659753	-0.311219	-0.0782258	-0.418712	-0.289802	-0.461955	-0.0782258	3.01329	0.0888797	-0.461955	-0.225961	-0.162392	-0.289802	-0.549259	-0.549259
Mo IL-12(p70) (78)	1.44214	-0.2786	-1.39521	1.81146	-0.390642	-1.61722	0.0582167	0.396071	0.396071	-0.726075	0.396071	1.30036	1.30036	0.677904	-0.530348	-0.194223	0.396071	-1.33954	-0.474673	-1.22819
Mo GM-CSF (73)	-0.401237	0.534135	0.798532	-0.776184			-0.401237	0.642842	-0.401237	-0.091391	-0.577809	-0.240326	2.56026	1.13356	-0.776184	0.420822	-0.240326	0.589102	-0.577809	-2.19552
Mo MIP-1b (75)	0.595128	-0.216897	-1.73467	0.0990875	-0.382339	-1.30603	-0.240167	0.513259	3.03106	-0.454843	0.12108	0.595128	0.991421	0.68622	-0.654338	-0.796935	-0.0679147	0.153856	0.110155	-1.04226
Mo IL-3 (18)	-0.542197	-0.260446	3.19412	-0.38536	-0.199377	-0.767042	-0.229911	-0.0758507	-0.447817	-0.260446	-0.260446	-0.260446	2.48905	0.0462876	-0.510274	-0.0147815	-0.260446	-0.106385	-0.574119	-0.574119
Mo MCP-1 (51)	0.489066	1.0078	-0.499186	0.489066	-0.285449	-1.62301	1.0078	0.57869	-0.499186	-0.499186	-0.0807746	0.489066	1.33143	1.17157	-0.959641	-0.959641	0.0184156	0.11597	-2.46436	1.17157
Mo IL-13 (37)	-0.686221	0.448498	-1.36847	-0.355315	-0.686221	-1.36847	0.762191	1.98125	1.98125	-0.520122	-0.686221	0.605775	0.994772	-0.355315	0.130501	0.448498	-0.355315	0.917532	-1.36847	-0.520122
Mo IL-1a (53)	1.55604	-0.615617	0.298543	0.352531	-1.38237	-0.291081	0.325233	-0.48095	1.42016	-0.969877	0.424111	0.638243	2.39984	0.171155	-0.0302394	-0.72238	0.234849	-1.11182	-0.949858	-1.26651
Mo IL-1b (19)	-0.288683	0.882545	-0.750576	0.739578	-0.140217	-1.38293	-0.750576	1.87232	0.448146	0.156714	0.156714	-1.38293	0.739578	1.31145	0.156714	1.16848	-1.064	0.739578	-1.54789	-1.064
Mo IL-9 (33)	-0.175446	0.298784	-0.193174	-0.0693933	-0.657274	-1.05806	-0.139673	-0.104533	3.80802	-0.55407	-0.284348	0.1845	0.101557	0.298784	-0.765542	-0.265987	0.489362	-0.513865	0.504874	-0.904519
Mo KC (57)	-1.44658	1.93255	-0.0977871	1.57185	0.160731	-0.713938	0.79323	1.04153	0.917891	-0.0109334	0.246563	-0.271495	0.66857	-0.0109334	-0.893776	-0.893776	0.331373	-0.140703	-1.25958	-1.92478
Mo IL-12(p40) (76)	0.0484619	1.46491	-0.793048	0.227095	1.16003	0.329944	1.60715	1.48452	0.179543	1.02262	-1.17474	-0.380128	-0.965756	-0.639986	-0.884838	-1.54668	-0.0397666	-0.921745	0.896876	-1.07446
	D5 CLP									D20 CLP
Mo G-CSF (54)	0.262286	0.752579	-0.0349688	2.96212	0.229562	0.759819	0.237862	1.21162	0.319763	-0.945307	-0.550958	-0.847121	-0.792844	-0.520642	-0.830971	-0.812957	-1.00562	-0.394229
Mo RANTES (55)	-0.481313	-0.771784	-0.612873	-0.396335	-0.470918	-0.654777	-0.840779	-0.706296	-0.857086	-0.239828	0.404521	-0.618395	2.13656	0.604167	0.649255	0.552453	2.58977	-0.286345
Mo IL-6 (38)	0.442553	0.707841	0.0100599	0.998685	0.0448637	0.905955	0.505589	0.635313	2.29349	-1.26259	-0.895084	-0.672388	-0.480115	-0.962258	-0.667277	-1.13968	-1.39597	0.931024
Mo Eotaxin (74)	-0.58035	0.158336	-0.443271	1.09965	-1.22014	0.369163	-0.379405	-0.825377	0.458337	0.207666	-0.59748	-0.384455	0.431226	0.798777	-1.11415	-0.747055	-0.284329	3.05286
Corticosterone	-0.256171	0.799051	-1.26422	1.39946	-1.03463	-0.106749	-1.16088	-1.02209	0.205455	-0.648266	-0.403138	1.44582	0.0982965	0.194275	-0.819773	1.86845	-0.669806	1.37492
Mo MIP-1a (77)	0.384277	-0.679754	-0.740997	2.65208	-0.619936	-0.285127	-1.55128	-0.447826	0.295869	-0.867905	0.25081	-1.46223	1.10687	0.720084	0.878719	0.112565	0.384277	-0.130485
Mo IL-10 (56)	-0.0584986	-0.261914	-0.949653	1.55688	-0.52926	-0.52926		-0.159238	-0.420449	-0.883785	0.655393	-1.09915	-0.261914	0.0897042	0.377392	-0.52926	0.0160871	2.98692
Mo IFN-g (34)	-0.458285	3.77348	-0.672424	-0.0148567	-0.473942	-0.112835	-0.560557	-0.648434	-0.234551	-0.357276	0.283372	-0.584294	0.0151934	-0.434801	0.0376679	4.2087e-05	-0.120411	0.562913
Mo IL-17 (72)	-0.540913	-0.464836	-0.910571	-0.819863	-0.561883	0.271066	-0.653079	-0.805233	0.0399081	0.684127	0.00138175	-0.732082	1.23959	1.81748	2.65092	-0.248796	-0.235141	-0.732082
Mo IL-4 (39)	0.866619	0.866619	0.2403	0.0252947	-1.31148	-0.629069		-1.31148	-0.292539	0.455305	0.866619	-0.404716	2.50253	0.455305	-1.07778	-1.07778	0.455305	-0.629069
Mo IL-5 (52)	0.641954	0.604876	-0.421945	-0.688069	0.45477	-0.0906351	-0.530189	-0.782558	2.19265	-0.421945	0.283135	-1.05407	2.56224	-0.253898	-0.465003	-0.597168	-0.552316	-0.881832
Mo IL-2 (36)	-0.564904	-0.333025	-0.537572	-0.511122	-0.357712	-0.676876	-0.459104	-0.484672	-0.357712	-0.459104	-0.16639	-0.0288501	0.618294	0.638572	3.59216	-0.0288501	-0.619567	0.736437
Mo TNF-a (21)	-0.247365	-0.214364	-0.347116	-0.0506407	-0.247365	0.461569	-0.7427	-0.448041	-0.0995548	-0.671786	-0.347116	-0.363883	-0.0832145	-0.347116	3.60318	-0.515965	-0.515965	1.17744
Mo IL-12(p70) (78)	0.454307	-1.85959	-0.538669	0.491355	0.196344	-1.63867	-0.61185	-0.465487	1.71211	0.67568	-0.538669	-1.45526	1.08229	0.454307	0.417259	0.823414	1.15639	-0.355259
Mo GM-CSF (73)	0.422925	-0.0805717	-0.351475	1.71468	-0.351475	0.705458	-0.810334	-0.938261	0.446014	-0.938261	-0.601513	-1.32768	0.446014	-0.243558	2.25939	-0.699852	-0.938261	1.28677
Mo MIP-1b (75)	-0.656504	3.32578	-0.87092	1.28308	-0.516136	-0.800975	-0.082723	-0.662794	-0.38404	-0.21099	0.266386	-0.856699	-0.0877826	0.22044	-0.169351	-0.1232	-0.38404	0.710465
Mo IL-3 (18)	-0.511885	-0.542138	-0.80652	-0.222511	-0.396135	0.885002	-0.836773	-0.62895	1.0823	-0.68814	-0.511885	0.178666	0.885002	-0.74733	2.92246	-0.396135	-0.74733	1.0823
Mo MCP-1 (51)	0.384277	-0.679754	-0.740997	2.65208	-0.619936	-0.285127	-1.55128	-0.447826	0.295869	-0.867905	0.25081	-1.46223	1.10687	0.720084	0.878719	0.112565	0.384277	-0.130485
Mo IL-13 (37)	-0.0830348	-0.0317302	-1.44538	-0.447713	-0.0317302	0.0703242	-1.21395	-1.21395	-0.342469	-0.134617	0.0703242	-0.553927	2.18393	0.571029	1.43946	-0.342469	-0.447713	1.95362
Mo IL-1a (53)	-0.446038	1.23851	-0.97945	2.0941	-0.401661	-0.0359947	0.220504	0.305708	1.2252	-0.401661	-0.625321	-1.61759	1.62371	-0.0075934	0.106899	-0.181551	-1.16938	-0.948386
Mo IL-1b (19)	-0.54921	-0.455365	-0.845993	-0.455365	0.139374	-0.6454		-0.711091	-0.455365	2.34237	-0.0928913		1.36756	-0.393193	2.06436	-0.332195	-0.332195	-0.6454
Mo IL-9 (33)	-0.531271	3.76241	-0.631808	0.578102	-0.32558	-0.308416	-0.24192	-0.669744	-0.0331999	-0.369142	0.117534	-0.461457	-0.154364	-0.316926	-0.131141	-0.249997	-0.541801	0.508721
Mo KC (57)	1.08609	0.384262	-0.383717	-1.38503	0.46721	2.58354	-0.925591	-0.30387	-0.0304774	-1.12585	-0.711632	-0.0113554	1.57008	-0.424028	-0.16614	-0.464339	-0.817578	0.658429
Mo IL-12(p40) (76)	-0.191305	-0.62784	-0.453188	-0.782985	-0.505073	-0.904442	-0.488916	-0.819655	-0.754468	-0.133286	1.3799	-0.513998	0.494327	1.40767	0.59379	0.406509	2.74594	-0.852975
