# Supplementary material for: Sepsis impedes EAE disease development and diminishes autoantigen-specific naive CD4 T cells
Source: eLife. 2020 Nov 16;9:e55800. doi: 10.7554/eLife.55800 (PMC7721438; doi:10.7554/eLife.55800)
Supplement: Figure 1—figure supplement 3—source data 1. [file elife-55800-fig1-figsupp3-data1.xlsx]

## Sheet: Figure 1-figure supplement 2
Sample:			Large/Lymphocytes | Freq. of Parent		Large/Lymphocytes/Single Cells | Freq. of Parent		Large/Lymphocytes/Single Cells/Myeloid cells | Freq. of Parent		Large/Lymphocytes/Single Cells/Myeloid cells/CD3_CD19- | Freq. of Parent		Large/Lymphocytes/Single Cells/Myeloid cells/CD3_CD19-/Microglia | Freq. of Parent			Large/Lymphocytes/Single Cells/Myeloid cells/CD3_CD19-/Microglia/MHCII+ | Freq. of Parent		Large/Lymphocytes/Single Cells/Myeloid cells/CD3_CD19-/Myeloid cells | Freq. of Parent			Large/Lymphocytes/Single Cells/Myeloid cells/CD3_CD19-/Myeloid cells/MHCII+ | Freq. of Parent
Pre_CLP__001.fcs	8	80000	93.8	75040	93.2	69937.3	18.1	12658.6	40.2	5088.78	80.4	5.85006	4091.38	2.44	99.8296	12	0.873144	610.653	29.3	178.921
Pre_CLP__002.fcs	11	110000	94.8	104280	94.4	98440.3	11.6	11419.1	52.9	6040.69	62.6	3.84139	3781.47	1.5	56.7221	21.4	1.31319	1292.71	19.3	249.493
Pre_CLP__003.fcs	10	100000	91.1	91100	93.2	84905.2	12.4	10528.2	42.2	4442.92	73.1	3.82518	3247.77	11.9	386.485	14.7	0.769222	653.109	48	313.492
Pre_CLP__004.fcs	16	160000	92.3	147680	93	137342	14.9	20464	38.2	7817.25	71.8	4.08671	5612.79	2.37	133.023	17.7	1.00745	1383.65	28.9	399.876
Pre_CLP__005.fcs	5	50000	94.1	47050	92.4	43474.2	27.1	11781.5	26	3063.19	89.1	6.27799	2729.3	11.3	308.411	6.19	0.436147	189.612	62.3	118.128
Pre_Sham__001.fcs	34	340000	97.6	331840	94.8	314584	29.2	91858.6	64.3	59065.1	51.7	9.70699	30536.7	57.3	17497.5	45.3	8.50535	26756.5	67.6	18087.4
Pre_Sham__002.fcs	32	320000	82.9	265280	92.8	246180	20.5	50466.9	49.1	24779.2	58.6	5.89838	14520.6	69.6	10106.4	37.5	3.77456	9292.21	84.1	7814.75
Pre_Sham__003.fcs	43	430000	93.9	403770	94.1	379948	28.2	107145	57.6	61715.6	53.2	8.64138	32832.7	42.9	14085.2	42.4	6.88712	26167.4	67.2	17584.5
Pre_Sham__004.fcs	28	280000	95.2	266560	93.4	248967	25.2	62739.7	45.5	28546.6	63	7.22358	17984.3	63.1	11348.1	32.2	3.69205	9191.99	64.1	5892.07
Pre_Sham__005.fcs	49	490000	96.7	473830	93.4	442557	29.3	129669	65.4	84803.7	46	8.81461	39009.7	61.6	24030	50.6	9.69607	42910.7	69.8	29951.6
