# Supplementary material for: Sepsis impedes EAE disease development and diminishes autoantigen-specific naive CD4 T cells
Source: eLife. 2020 Nov 16;9:e55800. doi: 10.7554/eLife.55800 (PMC7721438; doi:10.7554/eLife.55800)
Supplement: Figure 1—source data 1. [file elife-55800-fig1-data1.xlsx]

## Sheet: Figure 1B-D
Group	No Surgery												Sham
Mouse	1	2	3	4	5	6	7	8	9	10			1	2	3	4	5	6	7	8	9	10	11
6	0	0	0	0	0	0	0	0	0	0			0	0	0	0	0	0	0	0	0	0	0
7	1	0	1	0	1	1	0	0	1	0			0	0	0	2	0	0	0	0	0	0	0
8	3	0	2	0	3	1	1	2	2	0			1	0	1	3	5	0	0	1	1	1	1
9	4	0	2	0	3	2	2	2	2	2			1	0	2	2	5	1	5	2	0	1	0
10	4	0	3	0	4	4	3	2	2	3			2	0	2	2	5	2	5	3	1	1	0
11	4	1	4	0	4	4	4	2	3	2			2	1	4	3	5	2	5	4	2	3	1
12	4	2	4	0	4	3	3	2	2	2			2	1	3	2	5	2	5	4	3	4	1
13	4	2	4	1	4	4	4	4	3	3			2	1	3	2	5	3	5	4	4	4	1
14																	5		5
15																	5		5
16																	5		5
17																	5		5
18																	5		5
19																	5		5
20																	5		5
	D5 CLP												D25 CLP
Mouse	1	2	3	4	5	6	7	8					1	2	3	4	5	6	7	8	9	10	11	12
6	0	0	0	0	0	0	0	0					0	0	0	0	0	0	0	0	0	0	0	0
7	0	0	0	1	0	0	0	0					0	0	0	0	0	0	0	0	0	0	0	0
8	0	1	0	0	0	0	0	0					0	0	0	0	0	0	0	0	0	0	0	0
9	0	0	0	0	0	0	0	0					0	0	0	0	0	1	0	0	0	0	0	0
10	0	0	0	1	0	0	0	1					0	0	0	0	1	3	0	0	0	1	0	0
11	0	1	0	1	0	1	0	1					0	0	0	1	2	4	1	0	0	2	1	0
12	0	0	1	1	1	1	0	0					0	0	0	2	3	4	2	0	0	3	1	1
13	0	1	1	1	0	1	1	0					0	0	0	3	4	4	2	0	0	4	1	2
14
15
16
17
18
19
20
