# Supplementary material for: Sepsis impedes EAE disease development and diminishes autoantigen-specific naive CD4 T cells
Source: eLife. 2020 Nov 16;9:e55800. doi: 10.7554/eLife.55800 (PMC7721438; doi:10.7554/eLife.55800)
Supplement: Figure 1—source data 3. [file elife-55800-fig1-data3.xlsx]

## Sheet: Figure 1E-G
Mangalam Lab (investigator IDs below)
Histopathologic Scoring
9.18.19
Samantha Freedman--Effect of Sepsis on EAE
MENINGEAL SCORE* (please note there are three total scores per animal for each segement of spinal cord)									*Meningeal scoring rubric (Ammended for this project)
ID	Score		Sham (19R0377-19R0386)						0	no pathology
			CLP (19R0387-19R0391)						1	rare, scattered, mild meningeal inflammation
19R0377B	1								2	mild, multifocal but obvious meningeal inflammation
19R0377C	2								3	multifocal to coalescing, moderate meningeal inflammation
19R0377D	2								4	marked, diffuse, thick bands of meningeal inflammation
19R0378B	1
19R0378C	1
19R0378D	1
19R0379B	0
19R0379C	0
19R0379D	0
19R0380B	1
19R0380C	2
19R0380D	2
19R0381B	2
19R0381C	2
19R0381D	2
19R0382B	2
19R0382C	2
19R0382D	2
19R0383B	3
19R0383C	3
19R0383D	3
19R0384B	no tissue on slide
19R0384C	1
19R0384D	1
19R0385B	1
19R0385C	1
19R0385D	1
19R0386B	0
19R0386C	0
19R0386D	1
19R0387B	0
19R0387C	0
19R0387D	0
19R0388B	1
19R0388C	0
19R0388D	0
19R0389B	0
19R0389C	0
19R0389D	0
19R0390B	0
19R0390C	0
19R0390D	0
19R0391B	1
19R0391C	0
19R0391D	2
SPINAL CORD SCORE
ID	Score
19R0377B	2
19R0377C	2
19R0377D	1
19R0378B	1
19R0378C	1
19R0378D	1
19R0379B	0
19R0379C	0
19R0379D	0
19R0380B	1
19R0380C	2
19R0380D	1
19R0381B	1
19R0381C	1
19R0381D	3
19R0382B	2
19R0382C	2
19R0382D	1
19R0383B	3
19R0383C	3
19R0383D	2
19R0384B	no tissue on slide
19R0384C	0
19R0384D	1
19R0385B	0
19R0385C	0
19R0385D	1
19R0386B	0
19R0386C	0
19R0386D	0
19R0387B	0
19R0387C	0
19R0387D	0
19R0388B	0
19R0388C	0
19R0388D	0
19R0389B	0
19R0389C	0
19R0389D	0
19R0390B	0
19R0390C	0
19R0390D	0
19R0391B	0
19R0391C	0
19R0391D	0
