# Supplementary material for: Sepsis impedes EAE disease development and diminishes autoantigen-specific naive CD4 T cells
Source: eLife. 2020 Nov 16;9:e55800. doi: 10.7554/eLife.55800 (PMC7721438; doi:10.7554/eLife.55800)
Supplement: Figure 3—source data 1. [file elife-55800-fig3-data1.xlsx]

## Sheet: Figure 3
Sample:			Lymphocytes	#s	Single Cells	#s	CD4 T cells	Average	#s	# average	CD4 T cells/MOG	Average	of lymphocytes	of lymphocyte average	#s	# average		Large/Lymphocytes/Single Cells/CD4 T cells/MOG/IFNg | Freq. of Parent		Large/Lymphocytes/Single Cells/CD4 T cells/MOG/IL-17+ | Freq. of Parent		Large/Lymphocytes/Single Cells/CD4 T cells/MOG/TNFa | Freq. of Parent
Cytokines_CNS_CLP_001.fcs	37	1850000	22.4	414400	68.2	282621	1.75	1.49	4945.86	3742.88	0.85	0.425	0.014875	0.0074375	42.0398	21.0199		0	0	100	42.0398	100	42.0398
Cytokines_CNS_CLP_002.fcs	49	2450000	29.3	717850	80.7	579305	1.06	1.155	6140.63	4724.07	0	0	0	0	0	0		0	0	0	0	0	0
Cytokines_CNS_CLP_003.fcs	49	2450000	27.9	683550	81.4	556410	12.3	12.65	68438.4	62180.9	1.21	1.42	0.14883	0.180365	828.105	869.829		36.4	301.43	18.2	150.715	45.5	376.788
Cytokines_CNS_CLP_004.fcs	60	3000000	30.1	903000	75.1	678153	1.37	1.46	9290.7	8517.19	1.06	0.53	0.014522	0.007261	98.4814	49.2407		50	49.2407	50	49.2407	50	49.2407
Cytokines_CNS_CLP_005.fcs	20	1000000	53.2	532000	94.4	502208	6.15	6.73	30885.8	27235.5	1.68	1.775	0.10332	0.120009	518.881	479.962		52.6	272.932	26.3	136.466	68.4	354.915
Cytokines_CNS_CLP_006.fcs	45	2250000	30.2	679500	61.5	417892	1.9	1.8	7939.96	6479.48	0	0	0	0	0	0		0	0	0	0	0	0
Cytokines_CNS_CLP_007.fcs	21	1050000	62.4	655200	93.4	611957	14	15.3	85674	74803.6	3.37	3.38	0.4718	0.51727	2887.21	2527.27		57.1	1648.6	30.1	869.051	62.4	1801.62
Cytokines_CNS_CLP_008.fcs	21	1050000	50.9	534450	91	486350	3.6	4.48	17508.6	14265.7	3.47	2.105	0.12492	0.082292	607.548	344.559		60	364.529	20	121.51	60	364.529
Cytokines_CNS_CLP_009.fcs	16	800000	57.2	457600	96	439296	10.3	9.79	45247.5	36675.3	11.8	11.95	1.2154	1.16914	5339.2	4369.84		33.3	1777.95	31.7	1692.53	50.1	2674.94
Cytokines_CNS_Naive.fcs	35	1750000	26.8	469000	74.7	350343	1.26	1.7	4414.32	3816.86	0	0.56	0	0.011984	0	18.0286		0	0	0	0	0	0
Cytokines_CNS_Sham_001.fcs	41	2050000	41.9	858950	89	764466	27.2	30.35	207935	191595	6.11	6.87	1.66192	2.10899	12704.8	13038.4		46.4	5895.03	3.79	481.512	43.7	5552
Cytokines_CNS_Sham_002.fcs	55	2750000	44.1	1212750	89.3	1.08299e+06	20.6	24.65	223095	190293	4.27	4.815	0.87962	1.20897	9526.16	8983.84		42.9	4086.72	3.81	362.947	41.9	3991.46
Cytokines_CNS_Sham_003.fcs	51	2550000	27.8	708900	81.7	579171	21.8	24.7	126259	94391.1	11	11.45	2.398	2.8412	13888.5	10664.4		33.6	4666.55	15.3	2124.94	51.7	7180.37
Cytokines_CNS_Sham_004.fcs	44	2200000	60.3	1326600	94.1	1.24833e+06	23.4	27.3	292109	269011	4.39	4.38	1.02726	1.19535	12823.6	11785		40.6	5206.38	11.9	1526.01	53.8	6899.1
Cytokines_CNS_Sham_005.fcs	66	3300000	45.3	1494900	89.9	1.34392e+06	19.1	22.45	256688	236325	2.03	2.305	0.38773	0.526685	5210.76	5391.3		39.9	2079.09	17.2	896.251	57.1	2975.35
Cytokines_CNS_Sham_006.fcs	29	1450000	47.8	693100	89.6	621018	18.8	22.75	116751	110689	5.82	6.05	1.09416	1.38546	6794.93	6682.74		42.7	2901.43	8.99	610.864	58.4	3968.24
Cytokines_CNS_Sham_008.fcs	62	3100000	45.4	1407400	87.8	1.2357e+06	19.3	21.1	238490	216877	3.27	3.415	0.63111	0.723175	7798.61	7375.02		43.9	3423.59	17.3	1349.16	59.3	4624.57
Cytokines_CNS_Sham_009.fcs	69	3450000	44.5	1535250	88.9	1.36484e+06	20	23.15	272967	242301	4.66	4.735	0.932	1.09852	12720.3	11449.9		35.1	4464.82	14.7	1869.88	56.9	7237.84
Transcription Factors_CNS_CLP_001.fcs	37	1850000	21.1	390350	52.9	206495	1.23		2539.89		0		0		0
Transcription Factors_CNS_CLP_002.fcs	49	2450000	18	441000	60	264600	1.25		3307.5		0		0		0
Transcription Factors_CNS_CLP_003.fcs	49	2450000	23.6	578200	74.4	430181	13		55923.5		1.63		0.2119		911.553
Transcription Factors_CNS_CLP_004.fcs	60	3000000	24.1	723000	69.1	499593	1.55		7743.69		0		0		0
Transcription Factors_CNS_CLP_005.fcs	20	1000000	35.3	353000	91.4	322642	7.31		23585.1		1.87		0.136697		441.042
Transcription Factors_CNS_CLP_006.fcs	45	2250000	23.6	531000	55.6	295236	1.7		5019.01		0		0		0
Transcription Factors_CNS_CLP_007.fcs	21	1050000	40	420000	91.7	385140	16.6		63933.2		3.39		0.56274		2167.34
Transcription Factors_CNS_CLP_008.fcs	21	1050000	24.3	255150	80.6	205651	5.36		11022.9		0.74		0.039664		81.5694
Transcription Factors_CNS_CLP_009.fcs	16	800000	40.1	320800	94.4	302835	9.28		28103.1		12.1		1.12288		3400.48
Transcription Factors_CNS_Naive.fcs	35	1750000	16.5	288750	52.1	150439	2.14		3219.39		1.12		0.023968		36.0572
Transcription Factors_CNS_Sham_001.fcs	41	2050000	32.1	658050	79.5	523150	33.5		175255		7.63		2.55605		13372
Transcription Factors_CNS_Sham_002.fcs	55	2750000	26.5	728750	75.3	548749	28.7		157491		5.36		1.53832		8441.51
Transcription Factors_CNS_Sham_003.fcs	51	2550000	13.2	336600	67.3	226532	27.6		62522.8		11.9		3.2844		7440.21
Transcription Factors_CNS_Sham_004.fcs	44	2200000	39.5	869000	90.7	788183	31.2		245913		4.37		1.36344		10746.4
Transcription Factors_CNS_Sham_005.fcs	66	3300000	31.2	1029600	81.3	837065	25.8		215963		2.58		0.66564		5571.84
Transcription Factors_CNS_Sham_006.fcs	29	1450000	33.2	481400	81.4	391860	26.7		104627		6.28		1.67676		6570.55
Transcription Factors_CNS_Sham_008.fcs	62	3100000	34	1054000	80.9	852686	22.9		195265		3.56		0.81524		6951.44
Transcription Factors_CNS_Sham_009.fcs	69	3450000	27.9	962550	83.6	804692	26.3		211634		4.81		1.26503		10179.6
