# Supplementary material for: Sepsis impedes EAE disease development and diminishes autoantigen-specific naive CD4 T cells
Source: eLife. 2020 Nov 16;9:e55800. doi: 10.7554/eLife.55800 (PMC7721438; doi:10.7554/eLife.55800)
Supplement: Figure 4—source data 1. [file elife-55800-fig4-data1.xlsx]

## Sheet: Figure 4
Sample:			Large/Lymphocytes | Freq. of Parent		Large/Lymphocytes/Single Cells | Freq. of Parent		Large/Lymphocytes/Single Cells/CD4s | Freq. of Parent		Large/Lymphocytes/Single Cells/CD4s/Ag-Exp | Freq. of Parent		Fig
iLN_MOG tetramer_CLP_001.fcs	50	1250000	91	1137500	92.9	1.05674e+06	33.9	358234	9.29	33279.9	3.31	0.307499	1101.57
iLN_MOG tetramer_CLP_002.fcs	61	1525000	91.3	1392325	94.1	1.31018e+06	33.3	436289	8.23	35906.6	3.22	0.265006	1156.19
iLN_MOG tetramer_CLP_003.fcs	31	775000	92.7	718425	93.3	670291	32.7	219185	6.08	13326.4	2.48	0.150784	330.496
iLN_MOG tetramer_CLP_004.fcs	57	1425000	91.7	1306725	95.8	1.25184e+06	31.7	396834	3.78	15000.3	2.74	0.103572	411.009
iLN_MOG tetramer_CLP_005.fcs	50	1250000	85.8	1072500	95.9	1.02853e+06	25.1	258160	4.58	11823.7	2.23	0.102134	263.67
iLN_MOG tetramer_Sham_001.fcs	150	3750000	90.6	3397500	90.9	3.08833e+06	34.3	1.0593e+06	4.57	48409.8	5.14	0.234898	2488.27
iLN_MOG tetramer_Sham_002.fcs	135	3375000	92.4	3118500	90.2	2812887	25.3	711660	7.32	52093.5	3.81	0.278892	1984.76
iLN_MOG tetramer_Sham_003.fcs	147	3675000	92	3381000	94.8	3205188	26.7	855785	4.24	36285.3	6.47	0.274328	2347.66
iLN_MOG tetramer_Sham_004.fcs	157	3925000	95.4	3744450	91.6	3.42992e+06	35.6	1.22105e+06	2.6	31747.3	9.74	0.25324	3092.19
iLN_MOG tetramer_Sham_005.fcs	163	4075000	92.6	3773450	93.8	3.5395e+06	33.2	1.17511e+06	2.4	28202.7	3.53	0.08472	995.555
