# Supplementary material for: Sepsis impedes EAE disease development and diminishes autoantigen-specific naive CD4 T cells
Source: eLife. 2020 Nov 16;9:e55800. doi: 10.7554/eLife.55800 (PMC7721438; doi:10.7554/eLife.55800)
Supplement: Figure 5—source data 1. [file elife-55800-fig5-data1.xlsx]

## Sheet: Figure 5
D5		D25 tetramer		D25 CD4 CD44		D25 tetramer CD44
Sham	CLP	188	177	17.8	35.3	29.29	63.67
85	44	448	144	20.6	52.3	45.55	59.6
60	33	321	126	18.6	31.8	43.68	40.05
66	42	344	247	23.1	34.7	30.54	51.76
38	40	233	582	28.4	46.4	28.61	48.91
79	26	523	149	20.5	40.1	44.93	67.97
49	28	342	319	16.9	31.4	23.09	48.09
45	19	188	253	24.7	40	35.14	84.5
89	36	496	248	25.5	32.9	32.59	51.12
	37	304	418	31	36.6	49.91	80.17
			197		48		61.31
			397		43.8		65.37
			303		34.2		49.45
