# Supplementary material for: Sepsis impedes EAE disease development and diminishes autoantigen-specific naive CD4 T cells
Source: eLife. 2020 Nov 16;9:e55800. doi: 10.7554/eLife.55800 (PMC7721438; doi:10.7554/eLife.55800)
Supplement: Figure 6—figure supplement 1—source data 1. [file elife-55800-fig6-figsupp1-data1.xlsx]

## Sheet: Figure 6-figure supplement 1
Sample:			Large/Lymphocytes | Freq. of Parent		Large/Lymphocytes/Single Cells | Freq. of Parent		Large/Lymphocytes/Single Cells/2D2 | Freq. of Parent		Large/Lymphocytes/Single Cells/2D2/FAS+ | Freq. of Parent		Large/Lymphocytes/Single Cells/2D2/FASL+ | Freq. of Parent		Large/Lymphocytes/Single Cells/2D2/TRAIL+ | Freq. of Parent
Sham_Pre__001.fcs	31	3720000	96.3	3582360	95.8	3.4319e+06	0.31	10638.9	12.2	1297.94	10.4	1106.44	0	0
Sham_Pre__002.fcs	33	3960000	94.3	3734280	93.9	3.50649e+06	0.35	12272.7	15.5	1902.27	14.5	1779.54	0.19	23.3182
Sham_Pre__003.fcs	60	7200000	91.8	6609600	94.1	6.21963e+06	0.16	9951.41	24.3	2418.19	21.2	2109.7	0.57	56.7231
Sham_Pre__004.fcs	45	5400000	92.2	4978800	95	4729860	0.21	9932.71	21	2085.87	18.7	1857.42	0.28	27.8116
Sham_Pre__005.fcs	43	5160000	94.2	4860720	95.3	4.63227e+06	0.19	8801.31	13.6	1196.98	12	1056.16	0.091	8.00919
CLP_Pre__001.fcs	21	2520000	89.7	2260440	95.6	2.16098e+06	0.00925	199.891	15	29.9836	13.3	26.5855	3.33	6.65636
CLP_Pre__002.fcs	8	960000	90.5	868800	95.9	833179	0.11	916.497	21	192.464	17.3	158.554	0.82	7.51528
CLP_Pre__003.fcs	8	960000	92.5	888000	96	852480	0.15	1278.72	17.3	221.219	16.2	207.153	0.48	6.13786
CLP_Pre__004.fcs	9	1080000	90.8	980640	96.3	944356	0.099	934.913	14.9	139.302	13	121.539	0.47	4.39409
CLP_Pre__005.fcs	15	1800000	92.5	1665000	96.3	1603395	0.054	865.833	11.1	96.1075	8.29	71.7776	0	0
Sham_Post__001.fcs	67	8040000	97.7	7855080	94.5	7.42305e+06	0.027	2004.22	15.8	316.667	12.4	248.524	0.56	11.2237
Sham_Post__002.fcs	66	7920000	97.9	7753680	94.4	7.31947e+06	0.026	1903.06	8.15	155.1	9.26	176.224	0.37	7.04133
Sham_Post__003.fcs	87	10440000	97.3	10158120	93.6	9.508e+06	0.043	4088.44	10.1	412.932	10.4	425.198	0.33	13.4919
Sham_Post__004.fcs	62	7440000	95.7	7120080	95.1	6.7712e+06	0.023	1557.38	14.5	225.819	11.2	174.426	0	0
Sham_Post__005.fcs	74	8880000	96.7	8586960	95.8	8.22631e+06	0.065	5347.1	12.5	668.387	12.1	646.999	0.59	31.5479
CLP_Post__001.fcs	30	3600000	90.3	3250800	95.7	3.11102e+06	0.086	2675.47	39.9	1067.51	25.5	682.246	26.3	703.65
CLP_Post__002.fcs	27	3240000	88.5	2867400	96.4	2.76417e+06	0.031	856.894	13.9	119.108	14.8	126.82	4.63	39.6742
CLP_Post__003.fcs	31	3720000	92.2	3429840	95.9	3.28922e+06	0.12	3947.06	11.2	442.071	9.67	381.681	0.56	22.1035
CLP_Post__004.fcs	33	3960000	94.8	3754080	96.3	3.61518e+06	0.051	1843.74	8.72	160.774	6.98	128.693	0	0
CLP_Post__005.fcs	42	5040000	93.2	4697280	96.1	4.51409e+06	0.029	1309.08	4.29	56.1597	3.43	44.9016	0	0
