# Supplementary material for: Sepsis impedes EAE disease development and diminishes autoantigen-specific naive CD4 T cells
Source: eLife. 2020 Nov 16;9:e55800. doi: 10.7554/eLife.55800 (PMC7721438; doi:10.7554/eLife.55800)
Supplement: Figure 6—figure supplement 2—source data 1. [file elife-55800-fig6-figsupp2-data1.xlsx]

## Sheet: Figure 6-figure supplement 1
Sample:			Large/Lymphocytes | Freq. of Parent		Large/Lymphocytes/Single Cells | Freq. of Parent		Large/Lymphocytes/Single Cells/2D2 | Freq. of Parent		Large/Lymphocytes/Single Cells/2D2/FoxP3+ | Freq. of Parent		Large/Lymphocytes/Single Cells/2D2/RORgT+ | Freq. of Parent		Large/Lymphocytes/Single Cells/2D2/Tbet+ | Freq. of Parent		Large/Lymphocytes/Single Cells/Endo CD4 | Freq. of Parent		Large/Lymphocytes/Single Cells/Endo CD4/FoxP3+ | Freq. of Parent		Large/Lymphocytes/Single Cells/Endo CD4/RORgT+ | Freq. of Parent		Large/Lymphocytes/Single Cells/Endo CD4/Tbet+ | Freq. of Parent
Sham_Pre__001.fcs	31	3720000	97.1	3612120	95	3431514	0.31	10637.7	3.04	323.386	62.8	6680.47	11	1170.15	33.4	1.14613e+06	14.3	163896	8.25	94555.4	4.15	47564.2
Sham_Pre__002.fcs	33	3960000	97.1	3845160	91.9	3.5337e+06	0.37	13074.7	10.2	1333.62	83	10852	36.3	4746.12	17.7	625465	20.2	126344	18.7	116962	5.91	36965
Sham_Pre__003.fcs	60	7200000	95.5	6876000	89.3	6140268	0.19	11666.5	15.9	1854.97	82.1	9578.2	33	3849.95	21	1.28946e+06	20.7	266917	25.5	328811	7.43	95806.6
Sham_Pre__004.fcs	45	5400000	95.5	5157000	92.8	4785696	0.23	11007.1	9.58	1054.48	64.5	7099.58	22.5	2476.6	25	1196424	18	215356	17.1	204589	6.3	75374.7
Sham_Pre__005.fcs	43	5160000	96.2	4963920	90.4	4.48738e+06	0.22	9872.24	4.55	449.187	55.2	5449.48	13.4	1322.88	29.8	1.33724e+06	15.9	212621	10.6	141747	3.53	47204.6
CLP_Pre__001.fcs	21	2520000	96.3	2426760	94.7	2.29814e+06	0.012	275.777	9.52	26.254	42.9	118.308	19	52.3976	26.5	609008	27.2	165650	13.3	80998	6.64	40438.1
CLP_Pre__002.fcs	8	960000	95.5	916800	90.7	831538	0.12	997.845	14.2	141.694	79.1	789.295	22.6	225.513	29.7	246967	24.2	59765.9	16.4	40502.5	7.78	19214
CLP_Pre__003.fcs	8	960000	96.5	926400	93.7	868037	0.16	1388.86	6.79	94.3035	76.6	1063.87	21.9	304.16	28.9	250863	24.1	60457.9	13.1	32863	8.48	21273.2
CLP_Pre__004.fcs	9	1080000	96.4	1041120	91.8	955748	0.12	1146.9	5.35	61.359	45.3	519.545	16.7	191.532	28.1	268565	23	61770	12.2	32765	7.17	19256.1
CLP_Pre__005.fcs	15	1800000	97.3	1751400	95.1	1.66558e+06	0.071	1182.56	2.99	35.3586	41.9	495.494	10.2	120.621	27.3	454704	22.2	100944	7.47	33966.4	4.59	20870.9
Sham_Post__001.fcs	67	8040000	98.4	7911360	87.4	6.91453e+06	0.031	2143.5	6.52	139.756	67.4	1444.72	14.5	310.808	25.6	1.77012e+06	16.5	292070	10.8	191173	4.63	81956.5
Sham_Post__002.fcs	66	7920000	98.9	7832880	88.9	6.96343e+06	0.03	2089.03	4.4	91.9173	61	1274.31	16.5	344.69	34.2	2.38149e+06	14.9	354842	8.9	211953	3.98	94783.4
Sham_Post__003.fcs	87	10440000	99	10335600	88.6	9.15734e+06	0.049	4487.1	3.73	167.369	61.8	2773.03	8.24	369.737	30.8	2.82046e+06	15.5	437171	8.41	237201	2.13	60075.8
Sham_Post__004.fcs	62	7440000	97.7	7268880	92.3	6.70918e+06	0.03	2012.75	8.24	165.851	70.6	1421	18.2	366.321	31.5	2.11339e+06	17.3	365617	9.46	199927	4.98	105247
Sham_Post__005.fcs	74	8880000	97.9	8693520	91.7	7.97196e+06	0.069	5500.65	5.68	312.437	55.1	3030.86	10.9	599.571	37.4	2.98151e+06	14.3	426356	6.27	186941	3.03	90339.8
CLP_Post__001.fcs	30	3600000	94.7	3409200	90.5	3085326	0.069	2128.87	4.29	91.3287	30	638.662	15.7	334.233	31.4	968792	29.7	287731	10	96879.2	7.49	72562.5
CLP_Post__002.fcs	27	3240000	95.5	3094200	95.4	2.95187e+06	0.039	1151.23	7.14	82.1977	44.6	513.448	19.6	225.641	33.1	977068	23.6	230588	6.33	61848.4	3.09	30191.4
CLP_Post__003.fcs	31	3720000	97.7	3634440	95.6	3.47452e+06	0.16	5559.24	1.23	68.3786	38.4	2134.75	6.9	383.588	28.5	990240	21.2	209931	6.24	61790.9	3.56	35252.5
CLP_Post__004.fcs	33	3960000	98	3880800	93.4	3.62467e+06	0.053	1921.07	6.21	119.299	26.9	516.769	15.9	305.451	27.2	985909	21.6	212956	6.48	63886.9	6.43	63394
CLP_Post__005.fcs	42	5040000	97.4	4908960	90.5	4.44261e+06	0.035	1554.91	3.32	51.6231	20.7	321.867	4.98	77.4347	25.4	1.12842e+06	20.9	235840	4.64	52358.8	2.55	28774.8
FMO_FITC.fcs			97.5		95		0.098		0		96.9		48		28.2		0.21		77.4		24.6
FMO_PE.fcs			97		92.8		0.13		62.8		0.19		43		28.3		35.4		0.025		17
FMO_PerCP.fcs			97.9		96.3		0.1		28.7		95.7		0.57		30.1		26.3		76.7		0.055
										1003.13		7931.95		2713.14				197027		177333		60583
										175.466		1988.78		398.225				375211		205439		86480.5
										32.2377	0.322377	84.2223	0.842223	43.1289	0.431289			83.1845	0.831845	53.3208	0.533208	78.5108	0.785108
										132.946	1.32946	136.814	1.36814	174.931	1.74931			64.1252	0.641252	65.9562	0.659562	61.0154	0.610154
										184.919	1.84919	120.755	1.20755	141.9	1.419			135.473	1.35473	185.42	1.8542	158.141	1.58141
										105.119	1.05119	89.5061	0.895061	91.2817	0.912817			109.303	1.09303	115.37	1.1537	124.416	1.24416
										44.7786	0.447786	68.7029	0.687029	48.7583	0.487583			107.915	1.07915	79.933	0.79933	77.9172	0.779172
										2.61721	0.0261721	1.49154	0.0149154	1.93126	0.0193126			84.0748	0.840748	45.6757	0.456757	66.7482	0.667482
										14.1252	0.141252	9.95084	0.0995084	8.31189	0.0831189			30.3339	0.303339	22.8398	0.228398	31.7152	0.317152
										9.40093	0.0940093	13.4124	0.134124	11.2106	0.112106			30.6851	0.306851	18.5318	0.185318	35.114	0.35114
										6.11676	0.0611676	6.55003	0.0655003	7.05943	0.0705943			31.351	0.31351	18.4765	0.184765	31.7847	0.317847
										3.52483	0.0352483	6.24681	0.0624681	4.44583	0.0444583			51.2337	0.512337	19.154	0.19154	34.4501	0.344501
										79.6487	0.796487	72.6435	0.726435	78.0483	0.780483			77.8414	0.778414	93.0559	0.930559	94.7688	0.947688
										52.3847	0.523847	64.0747	0.640747	86.5565	0.865565			94.5714	0.945714	103.171	1.03171	109.601	1.09601
										95.3852	0.953852	139.433	1.39433	92.8461	0.928461			116.513	1.16513	115.461	1.15461	69.4675	0.694675
										94.5202	0.945202	71.4509	0.714509	91.9884	0.919884			97.4428	0.974428	97.3169	0.973169	121.7	1.217
										178.061	1.78061	152.398	1.52398	150.561	1.50561			113.631	1.13631	90.9959	0.909959	104.463	1.04463
										52.0492	0.520492	32.1132	0.321132	83.9307	0.839307			76.6851	0.766851	47.1572	0.471572	83.9063	0.839063
										46.8453	0.468453	25.8172	0.258172	56.6616	0.566616			61.4555	0.614555	30.1055	0.301055	34.9112	0.349112
										38.9697	0.389697	107.339	1.07339	96.3242	0.963242			55.95	0.5595	30.0775	0.300775	40.7636	0.407636
										67.9896	0.679896	25.9842	0.259842	76.703	0.76703			56.7564	0.567564	31.0978	0.310978	73.3044	0.733044
										29.4206	0.294206	16.1841	0.161841	19.4449	0.194449			62.8553	0.628553	25.4863	0.254863	33.2731	0.332731
