# Supplementary material for: Sepsis impedes EAE disease development and diminishes autoantigen-specific naive CD4 T cells
Source: eLife. 2020 Nov 16;9:e55800. doi: 10.7554/eLife.55800 (PMC7721438; doi:10.7554/eLife.55800)
Supplement: Figure 6—source data 1. [file elife-55800-fig6-data1.xlsx]

## Sheet: Figure 6B-D
Sample:			Large/Lymphocytes | Freq. of Parent		Large/Lymphocytes/Single Cells | Freq. of Parent		Large/Lymphocytes/Single Cells/CD4s | Freq. of Parent		Large/Lymphocytes/Single Cells/CD4s/2D2 | Freq. of Parent		Large/Lymphocytes/Single Cells/CD4s/2D2/Ki67+ | Freq. of Parent
iLN_Transcription Factors_Post_CLP_001.fcs	170	17000000	98.9	16813000	89.3	15014009	10.3	1.54644e+06	0.61	9433.3	60.8
iLN_Transcription Factors_Post_CLP_002.fcs	180	18000000	98.9	17802000	86.6	15416532	8.25	1.27186e+06	0.41	5214.64	67.4
iLN_Transcription Factors_Post_CLP_003.fcs	192	19200000	98.9	18988800	85.4	1.62164e+07	6.57	1.06542e+06	0.45	4794.39	49.1
iLN_Transcription Factors_Post_CLP_004.fcs	205	20500000	98.8	20254000	84.3	17074122	7.78	1.32837e+06	0.33	4383.61	46.2
iLN_Transcription Factors_Post_CLP_005.fcs	171	17100000	98.8	16894800	87.6	1.47998e+07	8.24	1.21951e+06	0.3	3658.52	58.2
iLN_Transcription Factors_Post_Sham_001.fcs	95	9500000	99.3	9433500	90.6	8546751	12.9	1.10253e+06	0.044	485.114	75
iLN_Transcription Factors_Post_Sham_002.fcs	87	8700000	99.4	8647800	92	7955976	13	1.03428e+06	0.061	630.909	86.9
iLN_Transcription Factors_Post_Sham_003.fcs	98	9800000	99.4	9741200	91.1	8.87423e+06	13.6	1.2069e+06	0.15	1810.34	81.9
iLN_Transcription Factors_Post_Sham_004.fcs	106	10600000	99.4	1.05364e+07	91	9.58812e+06	12.4	1.18893e+06	0.073	867.917	79.8
iLN_Transcription Factors_Post_Sham_005.fcs	104	10400000	99.4	10337600	91.7	9.47958e+06	14.4	1.36506e+06	0.14	1911.08	78.9
iLN_Transcription Factors_Pre_CLP_001.fcs	178	17800000	98.8	17586400	86	15124304	6.86	1.03753e+06	0.28	2905.08	75.3
iLN_Transcription Factors_Pre_CLP_002.fcs	193	19300000	98.9	19087700	83.3	1.59001e+07	5.08	807723	0.083	670.41	67.6
iLN_Transcription Factors_Pre_CLP_003.fcs	170	17000000	98.6	16762000	85.1	14264462	6.98	995659	0.12	1194.79	68.8
iLN_Transcription Factors_Pre_CLP_004.fcs	183	18300000	98.5	18025500	87.2	15718236	7.59	1.19301e+06	0.14	1670.22	75.8
iLN_Transcription Factors_Pre_CLP_005.fcs	156	15600000	98.4	15350400	89	13661856	8.51	1.16262e+06	0.27	3139.08	69.8
iLN_Transcription Factors_Pre_Sham_001.fcs	107	10700000	99.1	1.06037e+07	87.8	9.31005e+06	11.2	1.04273e+06	0.13	1355.54	79.5
iLN_Transcription Factors_Pre_Sham_002.fcs	102	10200000	99.3	10128600	89.4	9.05497e+06	12.5	1.13187e+06	0.12	1358.25	70.8
iLN_Transcription Factors_Pre_Sham_003.fcs	105	10500000	99.3	10426500	90.7	9.45684e+06	13.5	1.27667e+06	0.068	868.137	75.6
iLN_Transcription Factors_Pre_Sham_004.fcs	108	10800000	99.4	1.07352e+07	90.2	9.68315e+06	13	1.25881e+06	0.058	730.11	68.8
iLN_Transcription Factors_Pre_Sham_005.fcs	112	11200000	99.4	11132800	90.1	1.00307e+07	15.8	1.58484e+06	0.1	1584.84	78.2
