# Supplementary material for: Sepsis impedes EAE disease development and diminishes autoantigen-specific naive CD4 T cells
Source: eLife. 2020 Nov 16;9:e55800. doi: 10.7554/eLife.55800 (PMC7721438; doi:10.7554/eLife.55800)
Supplement: Figure 6—source data 2. [file elife-55800-fig6-data2.xlsx]

## Sheet: Figure 6B,E
Sample:	Large/Lymphocytes/Single Cells/2D2/Q1: Caspase3_7- , PI+ | Freq. of Parent	Large/Lymphocytes/Single Cells/2D2/Q2: Caspase3_7+ , PI+ | Freq. of Parent	Large/Lymphocytes/Single Cells/2D2/Q3: Caspase3_7+ , PI- | Freq. of Parent	Large/Lymphocytes/Single Cells/2D2/Q4: Caspase3_7- , PI- | Freq. of Parent
CLP_Post__001.fcs	0.78	22.7	35.1	41.4
CLP_Post__002.fcs	2.91	27.2	35	35
CLP_Post__003.fcs	2.53	23	16.5	57.9
CLP_Post__004.fcs	2.34	20	24.7	53
CLP_Post__005.fcs	3.28	13.5	24.6	58.6
CLP_Pre__001.fcs	0	13.3	41.7	45
CLP_Pre__002.fcs	1.21	25.1	21	52.7
CLP_Pre__003.fcs	2.25	30	14.2	53.6
CLP_Pre__004.fcs	5.67	27.4	17	49.9
CLP_Pre__005.fcs	3.32	20.6	25	51.1
Sham_Post__001.fcs	1.4	25	23	50.6
Sham_Post__002.fcs	2.04	20.4	18.2	59.3
Sham_Post__003.fcs	1.37	21.8	16.3	60.5
Sham_Post__004.fcs	3.51	22.8	15.8	57.9
Sham_Post__005.fcs	2.19	27.2	10.3	60.3
Sham_Pre__001.fcs	0	7.54	44.8	47.6
Sham_Pre__002.fcs	2.22	22.7	7.11	68
Sham_Pre__003.fcs	0	8	66	26
Sham_Pre__004.fcs	1.61	20.9	8.48	69
Sham_Pre__005.fcs	2.5	23.7	5.74	68.1
