# Supplementary material for: Sepsis impedes EAE disease development and diminishes autoantigen-specific naive CD4 T cells
Source: eLife. 2020 Nov 16;9:e55800. doi: 10.7554/eLife.55800 (PMC7721438; doi:10.7554/eLife.55800)
Supplement: Figure 7—source data 1. [file elife-55800-fig7-data1.xlsx]

## Sheet: Figure 7
Sample:	Large/Lymphocytes | Freq. of Parent	Large/Lymphocytes/Single Cells | Freq. of Parent	Large/Lymphocytes/Single Cells/2D2s | Freq. of Parent	Large/Lymphocytes/Single Cells/2D2s/CLP | Freq. of Parent	Large/Lymphocytes/Single Cells/2D2s/Sham | Freq. of Parent
Input_Naive.fcs	90.9	97.6	16.4	48.9	51.1	0.956947	1.04499
D5
Sample:			Large/Lymphocytes | Freq. of Parent		Large/Lymphocytes/Single Cells | Freq. of Parent		Large/Lymphocytes/Single Cells/2D2s | Freq. of Parent		Large/Lymphocytes/Single Cells/2D2s/Q1: Thy1_2- , CD44+ | Freq. of Parent	Large/Lymphocytes/Single Cells/2D2s/Q2: Thy1_2+ , CD44+ | Freq. of Parent	Large/Lymphocytes/Single Cells/2D2s/Q3: Thy1_2+ , CD44- | Freq. of Parent	Large/Lymphocytes/Single Cells/2D2s/Q4: Thy1_2- , CD44- | Freq. of Parent	CLP		Sham
Immunized__002.fcs	68	6800000	98.4	6691200	95.1	6.36333e+06	0.34	21635.3	52.3	43.3	2.18	2.18	54.48	11786.9	45.48	9839.75	0.834802
Immunized__003.fcs	51	5100000	97.3	4962300	93	4614939	0.64	29535.6	50.1	47.1	1.29	1.52	51.62	15246.3	48.39	14292.3	0.937427
Immunized__004.fcs	71	7100000	98.1	6965100	95.1	6.62381e+06	0.44	29144.8	44.4	52.1	1.86	1.66	46.06	13424.1	53.96	15726.5	1.17152
Immunized__005.fcs	55	5500000	97.2	5346000	95.3	5094738	0.32	16303.2	45.6	49.9	2.57	1.98	47.58	7757.04	52.47	8554.27	1.10277
Unimmunized__001.fcs	13	1300000	98.5	1280500	99.3	1.27154e+06	0.28	3560.3	2.46	2.46	46.3	48.8	51.26	1825.01	48.76	1736	0.951229
Unimmunized__002.fcs	17	1700000	97	1649000	98.8	1629212	0.25	4073.03	1.81	2.72	45.6	49.9	51.71	2106.16	48.32	1968.09	0.934442
D7
Sample:			Large/Lymphocytes | Freq. of Parent		Large/Lymphocytes/Single Cells | Freq. of Parent		Large/Lymphocytes/Single Cells/2D2s | Freq. of Parent		Large/Lymphocytes/Single Cells/2D2s/Q1: Thy1_2- , CD44+ | Freq. of Parent	Large/Lymphocytes/Single Cells/2D2s/Q2: Thy1_2+ , CD44+ | Freq. of Parent	Large/Lymphocytes/Single Cells/2D2s/Q3: Thy1_2+ , CD44- | Freq. of Parent	Large/Lymphocytes/Single Cells/2D2s/Q4: Thy1_2- , CD44- | Freq. of Parent	CLP		Sham
Immunized__001.fcs	47	4700000	98.5	4629500	97.9	4.53228e+06	0.38	17222.7	44.2	49.3	2.62	3.96	48.16	8294.44	51.92	8942.01	1.07807
Immunized__002.fcs	77	7700000	98.1	7553700	97	7327089	0.33	24179.4	50.5	43.2	2.82	3.47	53.97	13049.6	46.02	11127.4	0.852696
Immunized__003.fcs	56	5600000	98.5	5516000	97.3	5367068	0.23	12344.3	47.6	46.7	2.52	3.26	50.86	6278.29	49.22	6075.84	0.967755
Immunized__004.fcs	40	4000000	96	3840000	98.9	3797760	0.27	10254	47.6	46.6	3.14	2.66	50.26	5153.64	49.74	5100.32	0.989654
Immunized__005.fcs	38	3800000	97.7	3712600	97.9	3.63464e+06	0.32	11630.8	41.3	53.9	1.59	3.25	44.55	5181.54	55.49	6453.95	1.24557
