# Supplementary material for: Sepsis impedes EAE disease development and diminishes autoantigen-specific naive CD4 T cells
Source: eLife. 2020 Nov 16;9:e55800. doi: 10.7554/eLife.55800 (PMC7721438; doi:10.7554/eLife.55800)
Supplement: Figure 8—source data 1. [file elife-55800-fig8-data1.xlsx]

## Sheet: Figure 8B-C
		Sham pre														CLP pre														Sham post														CLP post
2019-09-17	1	0	0	0	0	0	0	0	0	0	0					0	0	0	0	0	0	0	0	0	0	0	0	0	0	0	0	0	0	0	0	0	0	0	0					0	0	0	0	0	0
2019-09-18	2	0	0	0	0	0	0	0	0	0	0					0	0	0	0	0	0	0	0	0	0	0	0	0	0	0	0	0	0	0	0	0	0	0	0					0	0	0	0	0	0
2019-09-19	3	0	0	0	0	0	0	0	0	0	0					0	0	0	0	0	0	0	0	0	0	0	0	0	0	0	0	0	0	0	0	0	0	0	0					0	0	0	0	0	0
2019-09-20	4	0	0	0	0	0	0	0	0	0	0					0	0	0	0	0	0	0	0	0	0	0	0	0	0	0	0	0	0	0	0	0	0	0	0					0	0	0	0	0	0
2019-09-21	5	0	0	0	0	0	0	0	0	0	0					0	0	0	0	0	0	0	0	0	0	0	0	0	0	0	0	0	0	0	0	0	0	0	0					0	0	0	0	0	0
2019-09-22	6	0	0	0	0	0	0	0	0	0	0					0	0	0	0	0	0	0	0	0	0	0	0	0	0	0	0	0	0	0	0	0	0	0	0					0	0	0	0	0	0
2019-09-23	7	0	0	0	0	0	0	0	0	0	0					0	0	0	0	0	0	0	0	0	0	0	0	0	0	0	0	0	0	0	0	0	0	0	0					0	0	0	0	0	0
2019-09-24	8	0	0	0	0	0	0	0	0	0	0					0	0	0	0	0	0	0	0	0	0	0	0	0	0	0	0	0	0	0	0	0	0	0	0					0	0	0	0	0	0
2019-09-25	9	0	0	0	0	0	0	0	0	0	0					0	0	0	0	0	0	0	0	0	0	0	0	0	0	0	0	0	0	0	0	0	0	0	0					0	0	0	0	0	1
2019-09-26	10	0	0	1	0	1	0	0	0	0	0					0	0	0	0	0	0	0	0	0	0	0	0	0	0	0	0	0	0	0	0	0	1	0	0					0	1	0	0	0	1
2019-09-27	11	0	0	3	0	3	0	0	0	0	0					0	0	0	0	0	1	0	0	0	0	0	0	0	1	0	1	0	0	0	0	0	2	0	1					0	2	0	0	0	3
2019-09-28	12	2	0	3	2	4	0	0	0	0	0					0	1	0	1	0	3	1	0	1	1	0	0	1	2	1	2	0	2	1	2	0	3	3	3					0	3	0	2	2	3
2019-09-29	13	2	1	3	2	4	1	1	1	2	1					1	1	1	1	1	3	1	0	1	1	1	1	5	3	2	3	2	3	2	3	0	4	4	3					0	3	0	3	3	3
2019-09-30	14	3	1	3	3	5	1	1	1	2	1					0	3	2	0	0	3	0	0	0	0	0	1	5	3	2	3	3	3	2	3	3	4	4	4					1	4	1	3	3	4
2019-10-01	15	3	1	4	4	5	1	1	1	3	2					0	3	1	3	0	3	0	0	0	0	0	2	5	3	2	3	2	3	2	3	3	4	4	3					0	4	1	3	3	4
2019-10-02	16	3	2	3	3	5	2	2	1	3	2					0	3	0	3	0	3	1	0	0	0	0	2	5	3	3	3	3	3	3	3	3	3	3	3					0	5	1	3	3	3
2019-10-03	17	3	2	3	3	5	3	2	1	3	3					0	3	0	3	0	3	1	0	0	0	0	3	5	2	3	3	3	3	3	3	3	3	3	3					0	5	1	3	3	3
2019-10-04	18	3	2	3	3	5	3	2	1	3	3					0	3	0	3	0	3	1	0	0	0	0	3	5	2	3	3	3	3	3	3	3	3	3	3					0	5	1	3	3	3
2019-10-05	19	3	2	3	3	5	3	2	1	3	3					0	3	0	3	0	3	1	0	0	0	0	3	5	2	3	3	3	3	3	3	3	3	3	3					0	5	1	3	3	3
2019-10-06	20	3	2	3	3	5	3	2	1	3	3					0	3	0	3	0	3	1	0	0	0	0	3	5	2	3	3	3	3	3	3	3	3	3	3					0	5	1	3	3	3
[truncated: 7 more columns]
