# Supplementary material for: Sepsis impedes EAE disease development and diminishes autoantigen-specific naive CD4 T cells
Source: eLife. 2020 Nov 16;9:e55800. doi: 10.7554/eLife.55800 (PMC7721438; doi:10.7554/eLife.55800)
Supplement: Figure 8—source data 2. [file elife-55800-fig8-data2.xlsx]

## Sheet: Figure 8D-G
Sample:			Large/Lymphocytes | Freq. of Parent		Large/Lymphocytes/Single Cells | Freq. of Parent		Large/Lymphocytes/Single Cells/CD4 T cells | Freq. of Parent		Large/Lymphocytes/Single Cells/CD4 T cells/2D2 | Freq. of Parent		Large/Lymphocytes/Single Cells/CD4 T cells/MOG | Freq. of Parent
CNS_Naive.fcs	7	42000	79.7	33474	78.9	26411	9.17	2421.89	0.56	13.5626	0.78	18.8907
CNS_Post_CLP_001.fcs	9	54000	67.1	36234	90.6	32828	24.4	8010.03	0.83	66.4833	4.39	351.64
CNS_Post_CLP_002.fcs	5	30000	69.6	20880	88.1	18395.3	24.3	4470.05	5.24	234.231	6.84	305.752
CNS_Post_CLP_003.fcs	12	72000	51	36720	86.3	31689.4	15.8	5006.92	3.04	152.21	4.34	217.3
CNS_Post_CLP_004.fcs	8	48000	57.1	27408	90.7	24859.1	21.5	5344.7	16.1	860.496	10.9	582.572
CNS_Post_CLP_005.fcs	7	42000	57.6	24192	93.7	22667.9	13.6	3082.83	3.17	97.7259	17.6	542.579
CNS_Post_Sham_001.fcs	31	186000	77.9	144894	79.6	115336	24.9	28718.6	0.33	94.7713	7.26	2084.97
CNS_Post_Sham_002.fcs	28	168000	74	124320	73	90753.6	23.7	21508.6	0.84	180.672	4.07	875.4
CNS_Post_Sham_003.fcs	33	198000	75.5	149490	79.9	119443	25.5	30457.8	0.3	91.3735	5.17	1574.67
CNS_Post_Sham_004.fcs	26	156000	67.5	105300	72.5	76342.5	19.5	14886.8	0.95	141.424	6.6	982.528
CNS_Post_Sham_005.fcs	74	444000	69	306360	75.7	231915	19.5	45223.3	0.5	226.117	6.06	2740.53
CNS_Pre_CLP_001.fcs	8	48000	69.6	33408	63.5	21214.1	7.13	1512.56	1.05	15.8819	1.48	22.3859
CNS_Pre_CLP_002.fcs	12	72000	55.9	40248	75.5	30387.2	10.2	3099.5	0.2	6.199	1.08	33.4746
CNS_Pre_CLP_003.fcs	22	132000	68.4	90288	86.1	77738	2.9	2254.4	1.16	26.1511	1.67	37.6485
CNS_Pre_CLP_004.fcs	14	84000	63.6	53424	83.6	44662.5	16.2	7235.32	0.11	7.95885	7.28	526.731
CNS_Pre_CLP_005.fcs	20	120000	65.2	78240	83.7	65486.9	8.89	5821.78	0.51	29.6911	3.43	199.687
CNS_Pre_Sham_001.fcs	55	330000	79.6	262680	76.8	201738	25.1	50636.3	0.2	101.273	3.77	1908.99
CNS_Pre_Sham_002.fcs	48	288000	82.6	237888	72.6	172707	19.5	33677.8	0.13	43.7811	1.8	606.2
CNS_Pre_Sham_003.fcs	40	240000	82.9	198960	67.8	134895	27.3	36826.3	0.18	66.2873	3.83	1410.45
CNS_Pre_Sham_004.fcs	33	198000	79.9	158202	63.9	101091	19.9	20117.1	0.34	68.3982	6.61	1329.74
CNS_Pre_Sham_005.fcs	42	252000	74.3	187236	70.2	131440	19.5	25630.7	0.27	69.203	6.72	1722.39
